# Supplementary material for: Selective detection of 1000 B. anthracis spores within 15 minutes using a peptide functionalized SERS assay
Source: Royal Society of Chemistry journal article supplement (doi:10.1039/c4an01163e), 2014-01-01
Supplement: c4an01163e1.pdf [file c4an01163e1.pdf]

### Electronic Supplementary Information

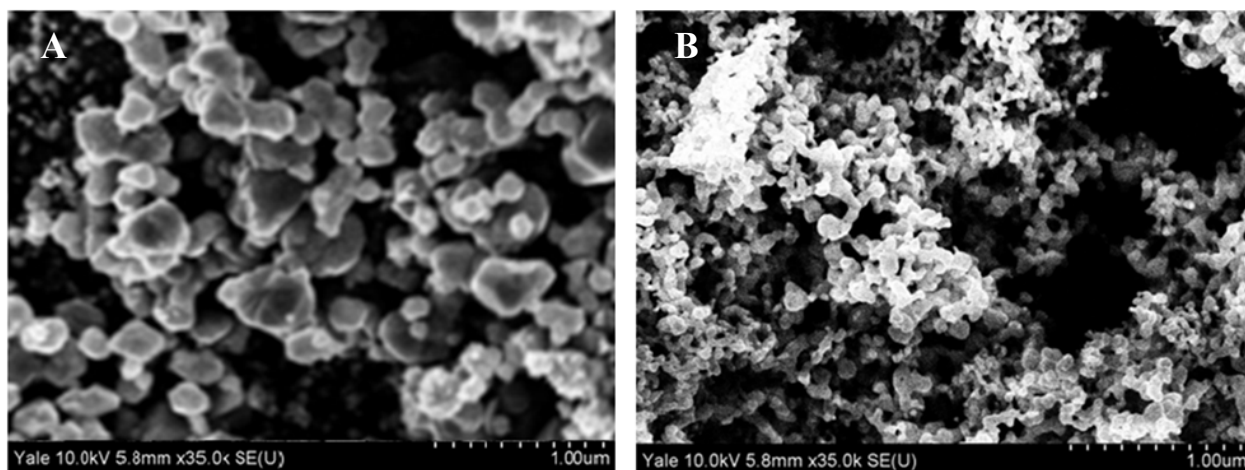

**Fig. ES11.** Scanning electron micrographs for A) the silver colloid and B) the silver-doped sol-gel.

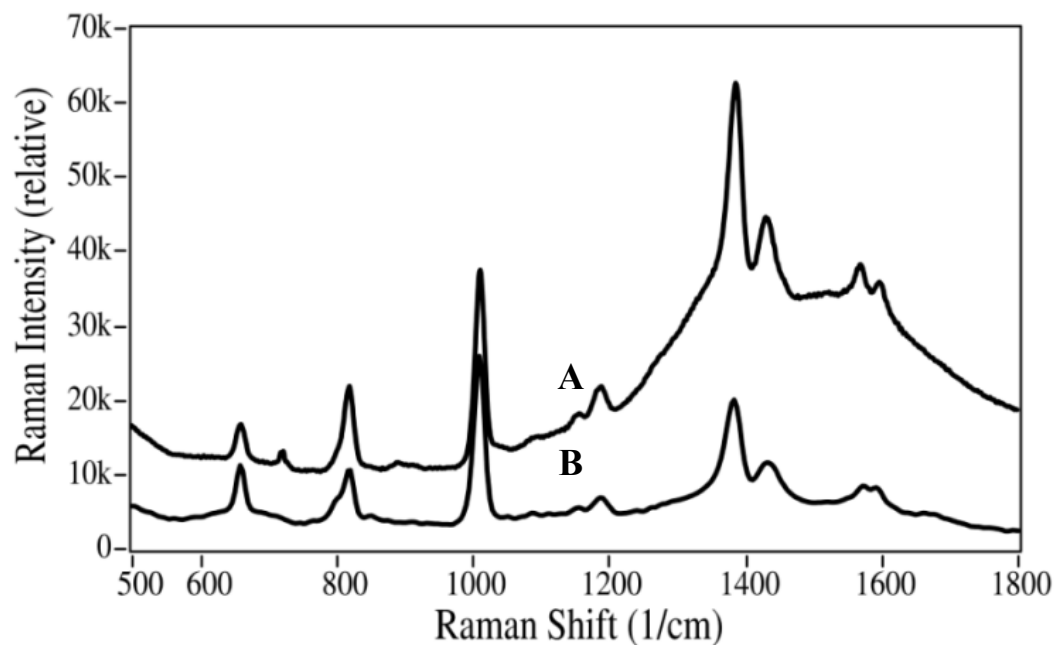

**Fig. ES12.** SERS of 1 μg/mL dipicolinic acid in water using A) silver colloids and B) silver-doped sol-gels. Spectral conditions: 75 mW of 785 nm laser excitation, ten 10 sec spectra averaged using a dispersive Raman spectrometer.

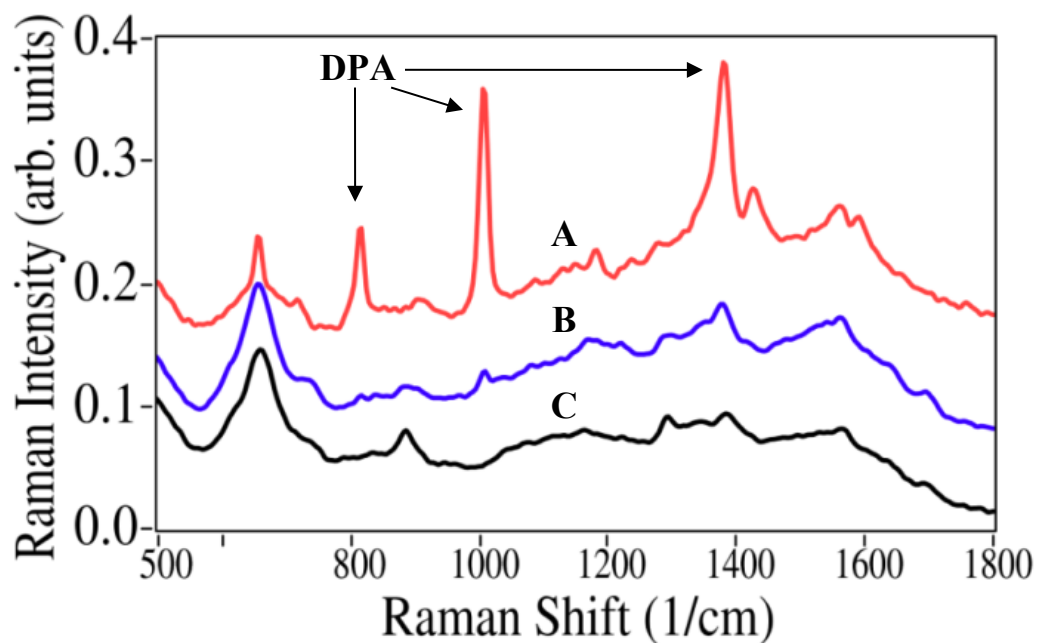

**Fig. ESI3.** SERS of 100  $\mu\text{g/mL}$  DPA added to SERS-active capillaries treated with A) 5, B) 10, and C) 50  $\mu\text{g/mL}$  peptide. Sample conditions: 0.5 hr peptide reaction time, DPA measured immediately afterwards. Spectral conditions: 75 mW of 785 nm laser excitation, ten 1 min spectra averaged using a Fourier transform Raman spectrometer. Spectra are displayed on same intensity scale, but offset for clarity.
